# Supplementary material for: Tracking the evolution of a cold stress associated gene family in cold tolerant grasses
Source: PubMed Central journal article supplement (PMC2542378; doi:10.1186/1471-2148-8-245), 2008-09-05
Supplement: 1471-2148-8-245-S2.pdf [file 1471-2148-8-245-S2.pdf]

LpIRI1 1 MG--L LLLFLGLFLPAACAATSS-CHPDDLRLALRGFAKNVGGGGVL-LRTAWSGTSCCV  
LpIRI2 1 -----  
LpIRI3 1 MAKCLMLLLSFAFLLSAAGTATATPCHRDDLRLALRGFAENLGGGGALS LRAAWSGASCCD  
LpIRI4 1 MAKCWQLLLFLALLLPAASAAS---CHPDDLALRDFAGNLRGGGV L-LRAALPGASCCG

LpIRI1 56 WEGVGCNGASGRITSLWLPRRGLAGTITGASLAGLAGLES LNLANNRLVGTIPSWIGELD  
LpIRI2 1 -----  
LpIRI3 61 WEGVGCDGASGRVTALWLPRSGLT-----GPIPSWICQLH  
LpIRI4 57 WEGVGCDGASGCVKSFQIL-----

LpIRI1 116 HLLYLDLSHNSLVGELPNRLRIRLKG LTTTGHL LGMTFTNMPLDVKHNRRTLAIQPNTIS  
LpIRI2 1 -----MPLHVKRSQGT LDEDHNTIT  
LpIRI3 96 HLR YLDLSGNALVGEV PKNLQVQLKG-----ITNMPLHVMRNRSLDEQPNTIS  
LpIRI4 76 -----LKGLTAAGRSLGKAFTHMPLHVKPSQGT LDEDHNTIT

LpIRI1 176 GTNNLVLSGRNNVVS GNDNTVISGNNNTVSGSFNTVVTGSDN ILTGSNHVVSGRSHIVTD  
LpIRI2 21 GSHNTVRS GSNVVS GNDNTVISGNNNVMSGSHNTVIFGGDNFVSGSYHVVS GNHHVVD  
LpIRI3 145 GSNNTVRS GSKNVLGNDNTVISGDNNSVSGSNNTVVS GNDNTVTGSNHVVS GTNHIVTD  
LpIRI4 113 GINNTVRS GSNVVS GNDNTVISGNNNVVSGSHNTVVFGGDNFISGSYHVVS GNHHVVD

LpIRI1 236 NNNSVSGDDNNVSGSFHKVSGSHNTVSGSNNTVSGRN-----HV  
LpIRI2 81 NKNAVSGDHNTVSGTQNTVSGNHQIVSGSHGTVSGNHNTVSGRNNSVYGKNIVSGSNHV  
LpIRI3 205 NNNNVSGDNNVSGSFHTVSGGHNTVSGSNNTVSGSN-----HV  
LpIRI4 173 NKNAVSGDHNTVSGSQNTVSGNHQIVSGSHSTVSGNHNTVSGRNNSVYGNNIVSGSNHV

LpIRI1 275 VSGSNKVVTGG  
LpIRI2 141 VYGNNKVVTGG  
LpIRI3 244 VSGSNKVVTDA  
LpIRI4 233 VYGNNKVVTGG
