# Supplementary material for: Tracking the evolution of a cold stress associated gene family in cold tolerant grasses
Source: BMC Evol Biol. 2008 Sep 5;8:245. doi: 10.1186/1471-2148-8-245 (PMC2542378; doi:10.1186/1471-2148-8-245)
Supplement: Additional file 1 — EST accession numbers. Table giving all EST accession numbers included in the full length IRI-like in silico mined sequences. [file 1471-2148-8-245-S1.pdf]

| EST contig |          | EST contig accession numbers |          |          |          |          |          |          |          |          |          |          |          |  |  |  |
|------------|----------|------------------------------|----------|----------|----------|----------|----------|----------|----------|----------|----------|----------|----------|--|--|--|
| TaC1       | BE490074 | CJ588184                     | CJ599857 | CJ603376 | CJ694370 | CJ705367 | CJ708689 | CJ708697 | CV762564 | CV772016 | CV773997 | CV779975 |          |  |  |  |
|            | CV782708 | DR740347                     | DR741812 |          |          |          |          |          |          |          |          |          |          |  |  |  |
| TaC2       | BJ314975 | CA701429                     | CJ597046 | CJ598753 | CJ600713 | CJ600905 | CJ601177 | CJ601604 | CJ602395 | CJ603454 | CJ603721 | CJ603833 | CJ604526 |  |  |  |
|            | CJ604676 | CJ604939                     | CJ702804 | CJ702804 | CJ703666 | CJ704377 | CJ706336 | CJ706607 | CJ707005 | CJ707732 | CJ708765 | CJ709227 | CJ709329 |  |  |  |
|            | CJ709329 | CJ709754                     | CJ709888 | CJ710129 | CK152036 | CV759508 | CV761182 | CV769038 | CV773203 | CV778070 | CV780144 | CV780534 | DR738876 |  |  |  |
|            | BE490254 | BF200590                     | BF474043 | BJ479842 | BJ224369 | BQ166227 | CJ589575 | CJ603506 | CJ695694 | CJ707855 | CJ709023 | CJ709261 | CJ710442 |  |  |  |
| TaC3       | CJ765575 | CK197682                     | CV772213 | CV773112 | DY742123 | DY742648 |          |          |          |          |          |          |          |  |  |  |
|            | BE489991 | BE518144                     | BQ161163 | CJ597574 | CJ599268 | CJ603351 | CJ603352 | CJ703304 | CJ704822 | CJ708663 | CJ708664 | CJ905398 | CJ905693 |  |  |  |
| TaC4       | CJ917110 | CJ917628                     | CV765043 | CV774448 | CV777200 | CV778490 | DR739621 | DR741024 |          |          |          |          |          |  |  |  |
|            | CA701027 | CJ588068                     | CJ592852 | CJ597942 | CJ601647 | CJ604251 | CJ694259 | CJ698813 | CJ703654 | CJ707042 | CJ709511 | CK204475 | CV758625 |  |  |  |
| TaC5       | CV774727 | CV775065                     | DR739497 |          |          |          |          |          |          |          |          |          |          |  |  |  |
|            | CA701727 | CJ591530                     | CJ597029 | CJ597169 | CJ599965 | CJ602185 | CJ697568 | CJ702789 | CJ702799 | CJ702918 | CJ705466 | CJ707531 |          |  |  |  |
| TaC6       | AL821611 | CJ600727                     | CJ601164 | CJ603769 | CJ606428 | CJ706175 | CJ706595 | CJ708574 | CJ708653 | CJ709272 | CJ711498 | CV758718 | CV765204 |  |  |  |
|            | CV766803 | CV773908                     | OV766991 |          |          |          |          |          |          |          |          |          |          |  |  |  |
| TaC7       | CA654225 | CA692123                     | CJ587606 | CJ588134 | CJ596938 | CJ598011 | CJ600484 | CJ693833 | CJ694320 | CJ702702 | CJ703718 | CJ705945 | CJ913399 |  |  |  |
|            | CK196896 | CK197231                     | CK205150 | CV778647 |          |          |          |          |          |          |          |          |          |  |  |  |
| TaC8       |          |                              |          |          |          |          |          |          |          |          |          |          |          |  |  |  |
| TaC9       | CJ602439 | CJ605514                     | CJ710676 |          |          |          |          |          |          |          |          |          |          |  |  |  |
| TaC10      | CJ597869 | CJ606637                     | CJ703587 | CJ711694 |          |          |          |          |          |          |          |          |          |  |  |  |
| TaC11      | CJ603876 | CJ709369                     |          |          |          |          |          |          |          |          |          |          |          |  |  |  |
| HvC1       | AJ460319 | AJ460320                     | AJ460321 | AJ460322 | AJ460323 | AJ460324 | AJ460325 | AJ466155 | BE411013 | BF621173 | BJ453528 | BJ453816 | BJ461352 |  |  |  |
|            | BM444259 | BY847463                     | BY849668 | BY868623 | CA003455 | CA003629 | CA003758 | CA004894 | CA007651 | CA009072 |          |          |          |  |  |  |
| HvC2       | AV909087 | AV909486                     | AV910970 | AV911379 | BJ447068 | BJ447899 | BJ448689 | BJ448772 | BJ449180 | BJ450004 | BJ450137 | BJ450698 | BJ451048 |  |  |  |
|            | BJ451602 | BJ451821                     | BJ453251 | BJ453323 | BJ454200 | BJ454271 | BJ454431 | BJ455071 | BJ455644 | BJ456413 | BJ456641 | BJ457114 | BJ457425 |  |  |  |
|            | BJ457564 | BJ458121                     | BJ458554 | BJ459099 | BJ459320 | BJ459722 | BJ460799 | BJ460867 | BJ461731 | BJ461803 | BJ461908 | BJ462238 | BY868126 |  |  |  |
|            | BY868350 |                              |          |          |          |          |          |          |          |          |          |          |          |  |  |  |
| HvC3       | BY836175 | BY836245                     | BY836317 | BY836782 | BY837301 | BY837351 | BY837813 | BY837818 | BY837835 | BY838037 | BY838069 | BY838097 | BY840347 |  |  |  |
|            | BY841876 | BY842473                     |          |          |          |          |          |          |          |          |          |          |          |  |  |  |
